# Supplementary material for: Dietary Supplementation of Leucine in Premating Diet Improves the Within-Litter Birth Weight Uniformity, Antioxidative Capability, and Immune Function of Primiparous SD Rats
Source: Hindawi journal article supplement (doi:10.1155/2018/1523147), 2018-01-01
Supplement: f1 [file 1523147.f1.pdf]

**Table S1.** List of primer sequences

| Gene                          | Forward (5'-3')            | Reverse (5'-3')           |
|-------------------------------|----------------------------|---------------------------|
| $\beta$ -actin <sup>(1)</sup> | TCCACCCGCGAGTACAACCTTCTT   | CGACGAGCGCAGCGATATCGT     |
| LHR                           | ATATTCAAGAGATGCACTGTGCAG   | AAGCAGAGTGTCAATGGGAAATAG  |
| FSHR                          | ACTGTGCATTCAACGGAA         | GCCTCCATGAGGGTGACA        |
| CYP17A1                       | ACTGAGGGTATCGTGGATGC       | TCGAACTTCTCCCTGCACTT      |
| CYP19A1                       | TCCTCAGCAGAGAAACTGGAAGA    | CGTACAGAGTGACGGACATGGT    |
| VEGFA                         | TGCACTGGACCCCTGGCTTTAC     | AGGGCTTCATCATTGCAGCAG     |
| Mucin-1 <sup>(2)</sup>        | CCATCCTATGAGTGAATACCCTACCT | AAGAGAGACTGCTACTGCCATTACC |

## Supplemental Literatures Cited:

(1) Silva JF, Ocarino NM, Serakides R: **Luteal activity of pregnant rats with hypo-and hyperthyroidism.** *Journal of ovarian research* 2014, **7**:75.

(2) LEE D-S, UETA YY, XUAN X, IGARASHI I, FUJISAKI K, SUGIMOTO C, TOYODA Y, SUZUKI H: **Expression patterns of the implantation-associated genes in the uterus during the estrous cycle in mice.** *Journal of Reproduction and Development* 2005, **51**:787-798.
